# Supplementary material
Source: PubMed Central journal article supplement (PMC4243353)
Supplement: ASN.2013101128_ASN2013101128SupplementaryData.pdf [file ASN.2013101128_ASN2013101128SupplementaryData.pdf]

## Supplemental Figure 1

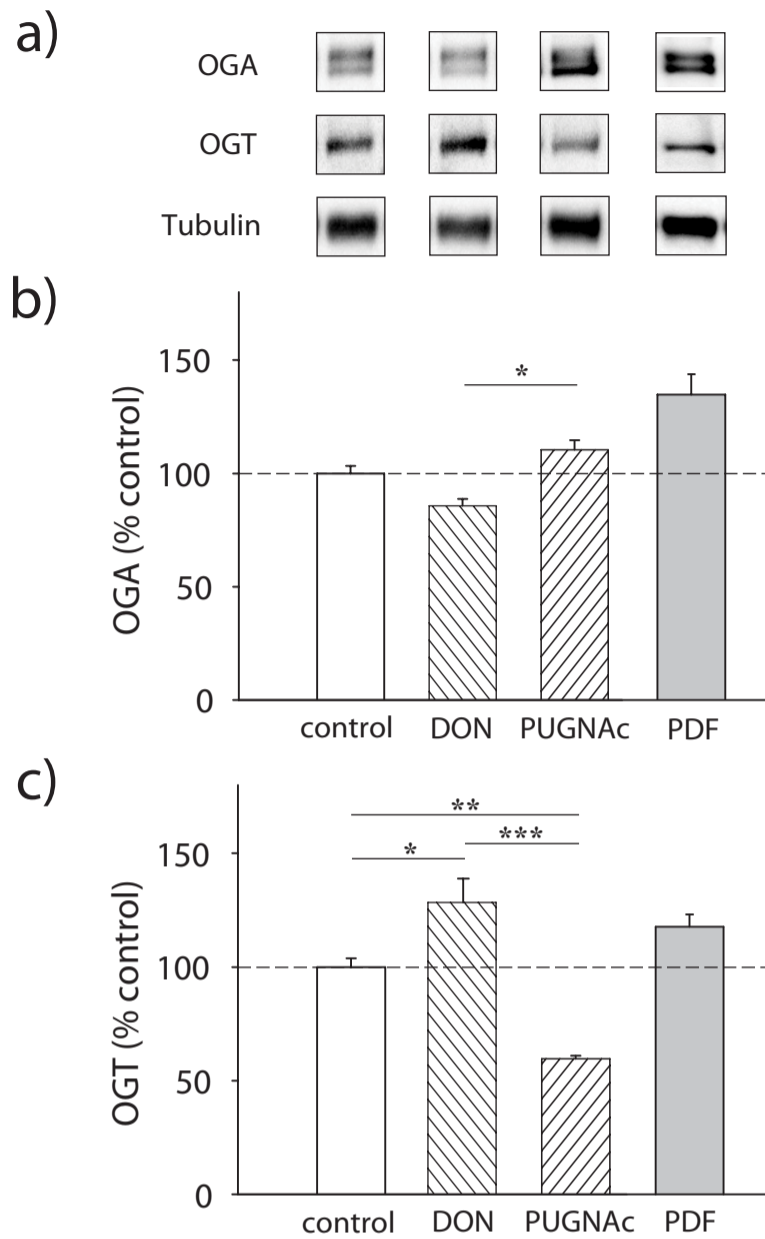

**Supplemental Figure 1: O-GlcNAcase (OGA) and O-GlcNAc transferase (OGT) abundance following O-GlcNAc modulation.** MeT-5A cells show altered OGA and OGT abundance after incubation with O-GlcNAc inhibitors DON (50  $\mu$ M) or PUGNAc (100  $\mu$ M) (hatched bars) or 30 minutes PDF and subsequent incubation with PDF 1:1 diluted with growth medium for 6 h (grey bars) compared to control (white bar). Panel **a**) shows representative western blots, panel **b**) shows OGA abundance and panel **c**) shows OGT abundance as percentage of untreated control. \*\*\*  $p < 0.001$ ; \*\*  $p < 0.01$ ; \*  $p < 0.05$

## Supplemental Figure 2

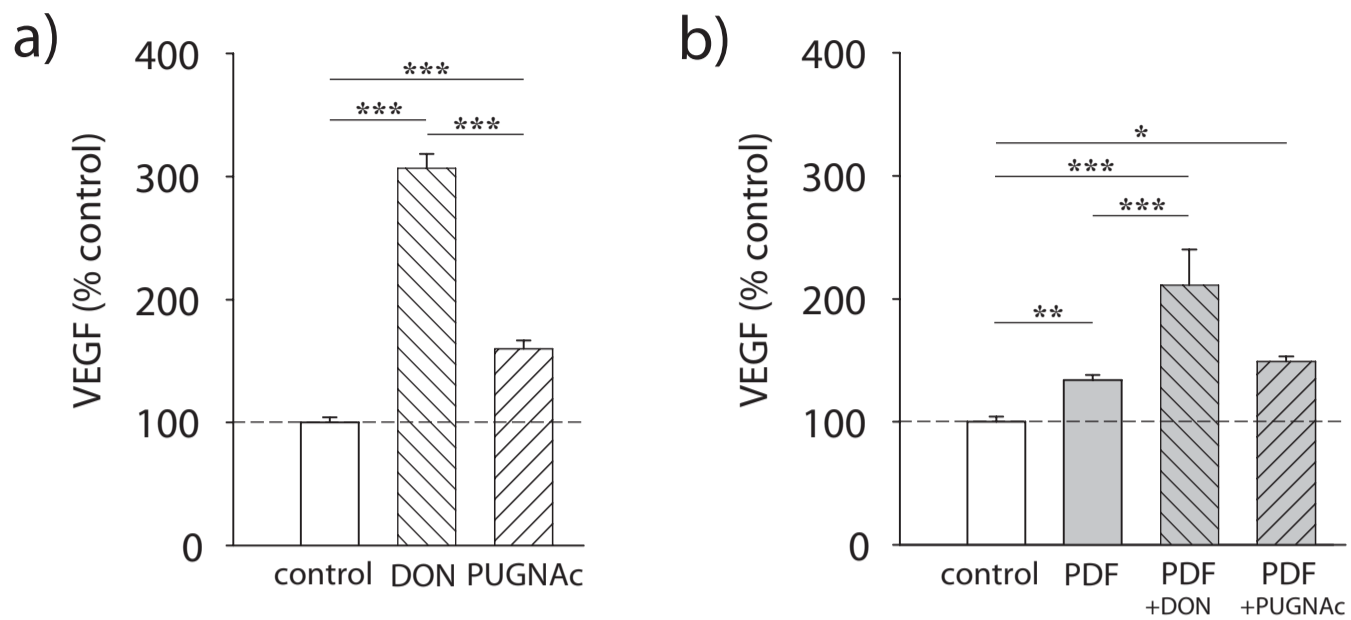

**Supplemental Figure 2: Vascular endothelial growth factor (VEGF) concentrations following O-GlcNAc modulation.** VEGF concentrations in supernatants of MeT-5A cells. Panel **a)** shows significant changes after modulation of O-GlcNAc abundance with 50  $\mu$ M DON or 100  $\mu$ M PUGNAc (hatched bars) compared to control (white bar). Panel **b)** shows VEGF concentrations after 30 minutes PDF and subsequent incubation with PDF 1:1 diluted with growth medium for 6 h (grey bars) and changed VEGF levels after pre-incubation with 50  $\mu$ M DON or 100  $\mu$ M PUGNAc (hatched grey bars) prior to PDF. \*\*\*  $p < 0.001$ ; \*\*  $p < 0.01$ ; \*  $p < 0.05$
